# Supplementary material
Source: PubMed Central journal article supplement (PMC2670930)

## Supplemental Table

**Supplemental Table 1:** Real time PCR primers of mouse PPAR $\alpha$ -targeted genes.

| Gene            |         | Sequence                     |
|-----------------|---------|------------------------------|
| <i>mCpt1</i>    | Forward | 5'-TGAGTGGCGTCCTCTTTGG-3'    |
|                 | Reverse | 5'-CAGCGAGTAGCGCATAGTCATG-3' |
| <i>mCpt2</i>    | Forward | 5'-TGACTGGATAGGCTGCAATGTC-3' |
|                 | Reverse | 5'-CGAGGGCATCGAACATGTCT-3'   |
| <i>mAcot1</i>   | Forward | 5'-ATGGCAGCAGCTCCAGACTT-3'   |
|                 | Reverse | 5'-CCCAACCTCCAAACCATCAT-3'   |
| <i>mCyp4a10</i> | Forward | 5'-CCAGGAACTGCATTGGGAAA-3'   |
|                 | Reverse | 5'-GACCCTGGTAGGATCTGGCA-3'   |

## Supplemental Figures

**Supplemental Figure 1.** MS<sup>2</sup> fragmentation of acylcarnitines. Details of LC-MS conditions were described in the *Experimental procedures*. Major fragment ions were interpreted in the inlaid structural diagrams. **A**, Myristoylcarnitine (**II**). **B**, Oleoylcarnitine (**III**). **C**, Palmitoleoylcarnitine (**IV**).

**Supplemental Figure 2.** PCA of time-dependent metabolomic changes induced by 400 mg/kg APAP treatment. **A**, Original scores plot of PCA model on serum metabolomes of APAP-treated wild-type and *Cyp2e1*-null mice (wild-type mice: ● and *Cyp2e1*-null mice: ○). The timing of sample collection was labeled beside the data point. The t[1] and t[2] values represent the scores of each sample in principal component 1 and 2, respectively (corresponding to Figure 3A). **B**, Loadings scatter plot of the PCA model. Data point representing palmitoylcarnitine (**I**) was labeled in the plot.

# Supplemental Figure 1

## A

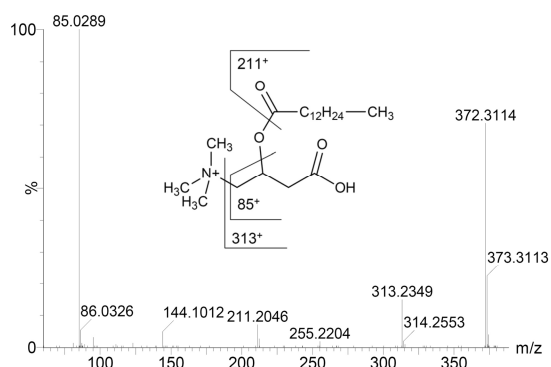

## B

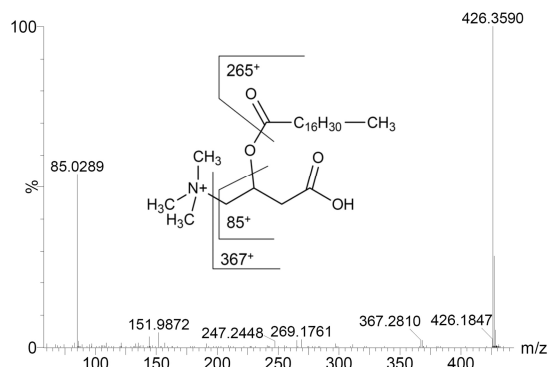

## C

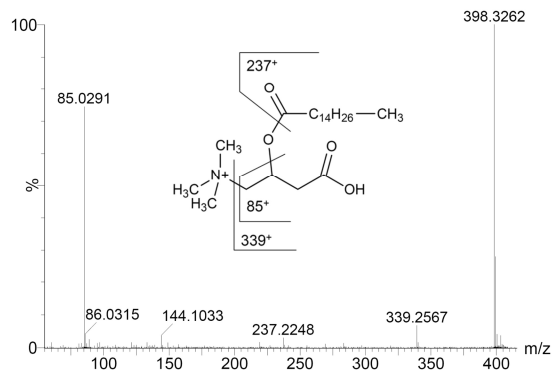

# Supplemental Figure 2

## A

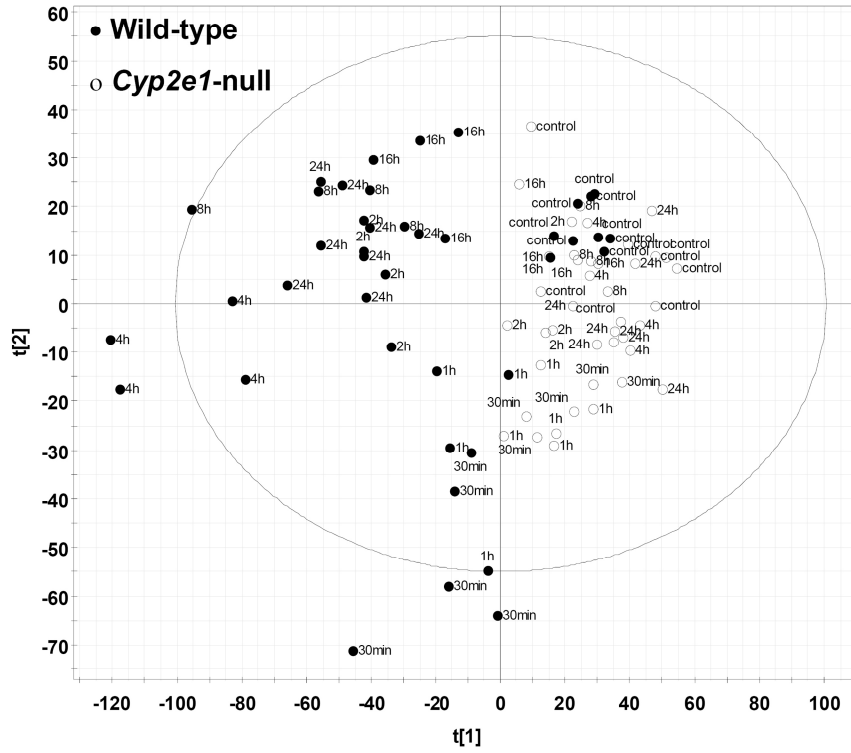

## B

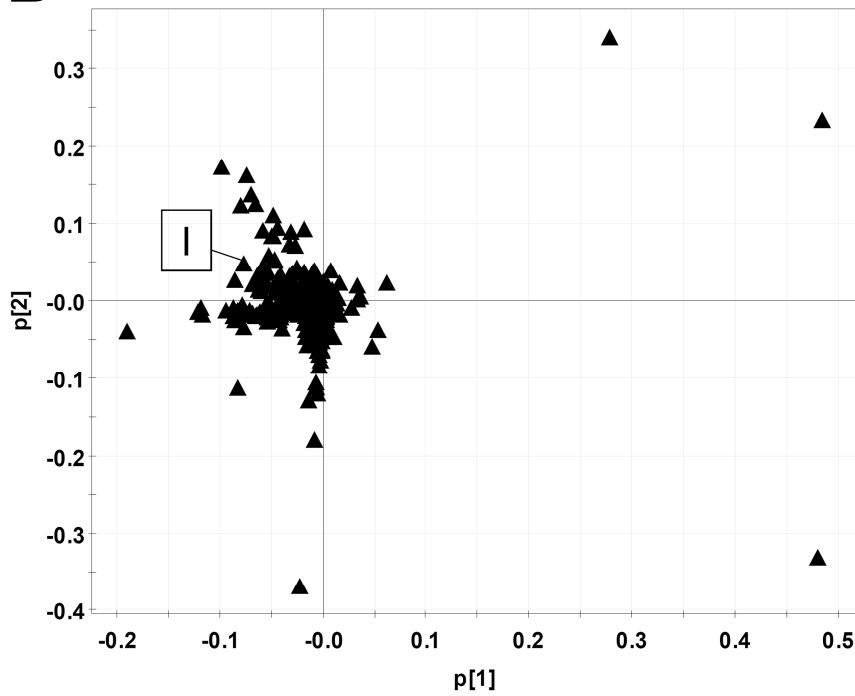

Supplement: NIHMS91673-supplement-1.pdf [file NIHMS91673-supplement-1.pdf]
